# Supplementary material
Source: publisher site journal article supplement (https://www.dovepress.com/article/408663)
Supplement: Supplementary file 1 [file get_supplementary_file.php]

**Supplementary Table 1.** Cytokine profile of Covid-19 RT-PCR positive and RT-PCR negative men at the time of hospitalization.

| Parameters    | Admission (RT-PCR negative result)<br>N=30 | Admission (RT-PCR positive result)<br>N=105 | p                   |
|---------------|--------------------------------------------|---------------------------------------------|---------------------|
| CRP (mg/L)    | 8.42 (0.00-49.00)                          | 100.00 (3.00-270.00)                        | <0.001 <sup>a</sup> |
| IL-2 (pg/ml)  | 1.00 (0.00-1.00)                           | 0.00 (0.00-22.00)                           | 0.636               |
| IL-4 (pg/ml)  | 1.09 (0.89-1.64)                           | 1.05 (0.00-3.25)                            | 0.106               |
| IL-6 (pg/ml)  | 2.44 (0.49-255.90)                         | 9.48 (0.39-290.95)                          | 0.089               |
| IL-8 (pg/ml)  | 18.17 (2.33-73.32)                         | 28.94 (1.88-797.00)                         | 0.435               |
| IL-10 (pg/ml) | 0.94 (0.25-30.36)                          | 1.93 (0.00-73.36)                           | 0.011 <sup>a</sup>  |
| VEGF (pg/ml)  | 146.20 (8.62-464.02)                       | 242.63 (27.02-1183.40)                      | 0.012 <sup>a</sup>  |
| IFNG (pg/ml)  | 0.24 (0.00-6.58)                           | 0.43 (0.00-37.61)                           | 0.086               |
| TNFA (pg/ml)  | 6.04 (1.45-51.15)                          | 6.15 (2.75-29.53)                           | 0.389               |
| IL-1A (pg/ml) | 0.00 (0.00-0.24)                           | 0.08 (0.00-1.02)                            | 0.045 <sup>a</sup>  |
| IL-1B (pg/ml) | 1.04 (0.60-2.16)                           | 0.88 (0.00-2.94)                            | 0.723               |
| MCP-1 (pg/ml) | 152.39 (30.73-697.00)                      | 171.01 (14.89-697.00)                       | 0.052               |
| EGF (pg/ml)   | 81.01 (47.92-289.81)                       | 139.92 (8.87-707.51)                        | 0.966               |

Data are expressed as median (IQR) (25<sup>th</sup>-75<sup>th</sup> percentile)

<sup>a</sup>Significant difference between Admission (RT-PCR negative results) and Admission (RT-PCR positive results) by Mann Whitney U test

CRP: C-Reactive Protein, EGF: epidermal growth factor, IFNG: Interferon- $\gamma$ , IL-2: Interleukin-2, IL-4: Interleukin-4, IL-6: Interleukin-6, IL-8: Interleukin-8, IL-10: Interleukin-10, IL-1A: Interleukin-1 $\alpha$ , IL-1B: Interleukin-1 $\beta$ , MCP-1: Monocyte Chemoattractant Protein-1, TNFA: Tumor Necrosis Factor- $\alpha$ , VEGF: Vascular Endothelial Growth Factor

**Supplementary Table 2.** Cytokine profile of Covid-19 RT-PCR positive and RT-PCR negative women at the time of hospitalization.

| Parameters    | Admission (RT-PCR negative result) N=29 | Admission (RT-PCR positive result)N=97 | P value            |
|---------------|-----------------------------------------|----------------------------------------|--------------------|
| CRP (mg/L)    | 39.75 (1.00-149.00)                     | 77.59 (2.00-269.00)                    | 0.038 <sup>a</sup> |
| IL-2 (pg/ml)  | 0.50 (0.00-4.00)                        | 1.00 (0.00-28.00)                      | 0.840              |
| IL-4 (pg/ml)  | 1.09 (0.51-1.49)                        | 1.13 (0.49 – 1.69)                     | 0.265              |
| IL-6 (pg/ml)  | 15.68 (2.24-108.25)                     | 9.75 (0.57-462.27)                     | 0.716              |
| IL-8 (pg/ml)  | 34.28 (4.69-797.00)                     | 19.59 (4.78-263.68)                    | 0.687              |
| IL-10 (pg/ml) | 0.89 (0.26-3.69)                        | 2.42 (0.23-78.65)                      | 0.484              |
| VEGF (pg/ml)  | 185.43 (50.47-535.67)                   | 151.66 (2.55-620.3)                    | 0.185              |
| IFNG (pg/ml)  | 0.73 (0.00-48.67)                       | 0.39 (0.00-33.23)                      | 0.545              |
| TNFA (pg/ml)  | 7.29 (2.71-12.81)                       | 5.73 (1.27-17.45)                      | 0.496              |
| IL-1A (pg/ml) | 0.00 (0.00-1.15)                        | 0.00 (0.00-0.32)                       | 0.700              |
| IL-1B (pg/ml) | 0.91 (0.00-20.36)                       | 0.80 (0.00-3.88)                       | 0.629              |
| MCP-1 (pg/ml) | 162.19 (54.03-697.00)                   | 160.54 (16.49-697.00)                  | 0.441              |
| EGF (pg/ml)   | 95.65 (4.96-282.45)                     | 85.63 (13.95-367.94)                   | 0.931              |

Data are expressed as median (IQR) (25<sup>th</sup>-75<sup>th</sup> percentile)

<sup>a</sup>Significant difference between Admission (RT-PCR negative results) and Admission (RT-PCR positive results) by Mann Whitney U test

CRP: C-Reactive Protein, EGF: epidermal growth factor, IFNG: Interferon- $\gamma$ , IL-2: Interleukin-2, IL-4: Interleukin-4, IL-6: Interleukin-6, IL-8: Interleukin-8, IL-10: Interleukin-10, IL-1A: Interleukin-1 $\alpha$ , IL-1B: Interleukin-1 $\beta$ , MCP-1: Monocyte Chemoattractant Protein-1, TNFA: Tumor Necrosis Factor- $\alpha$ , VEGF: Vascular Endothelial Growth Factor

Supplementary Figure 1a. Relationship between cytokines and length of stay in the hospital

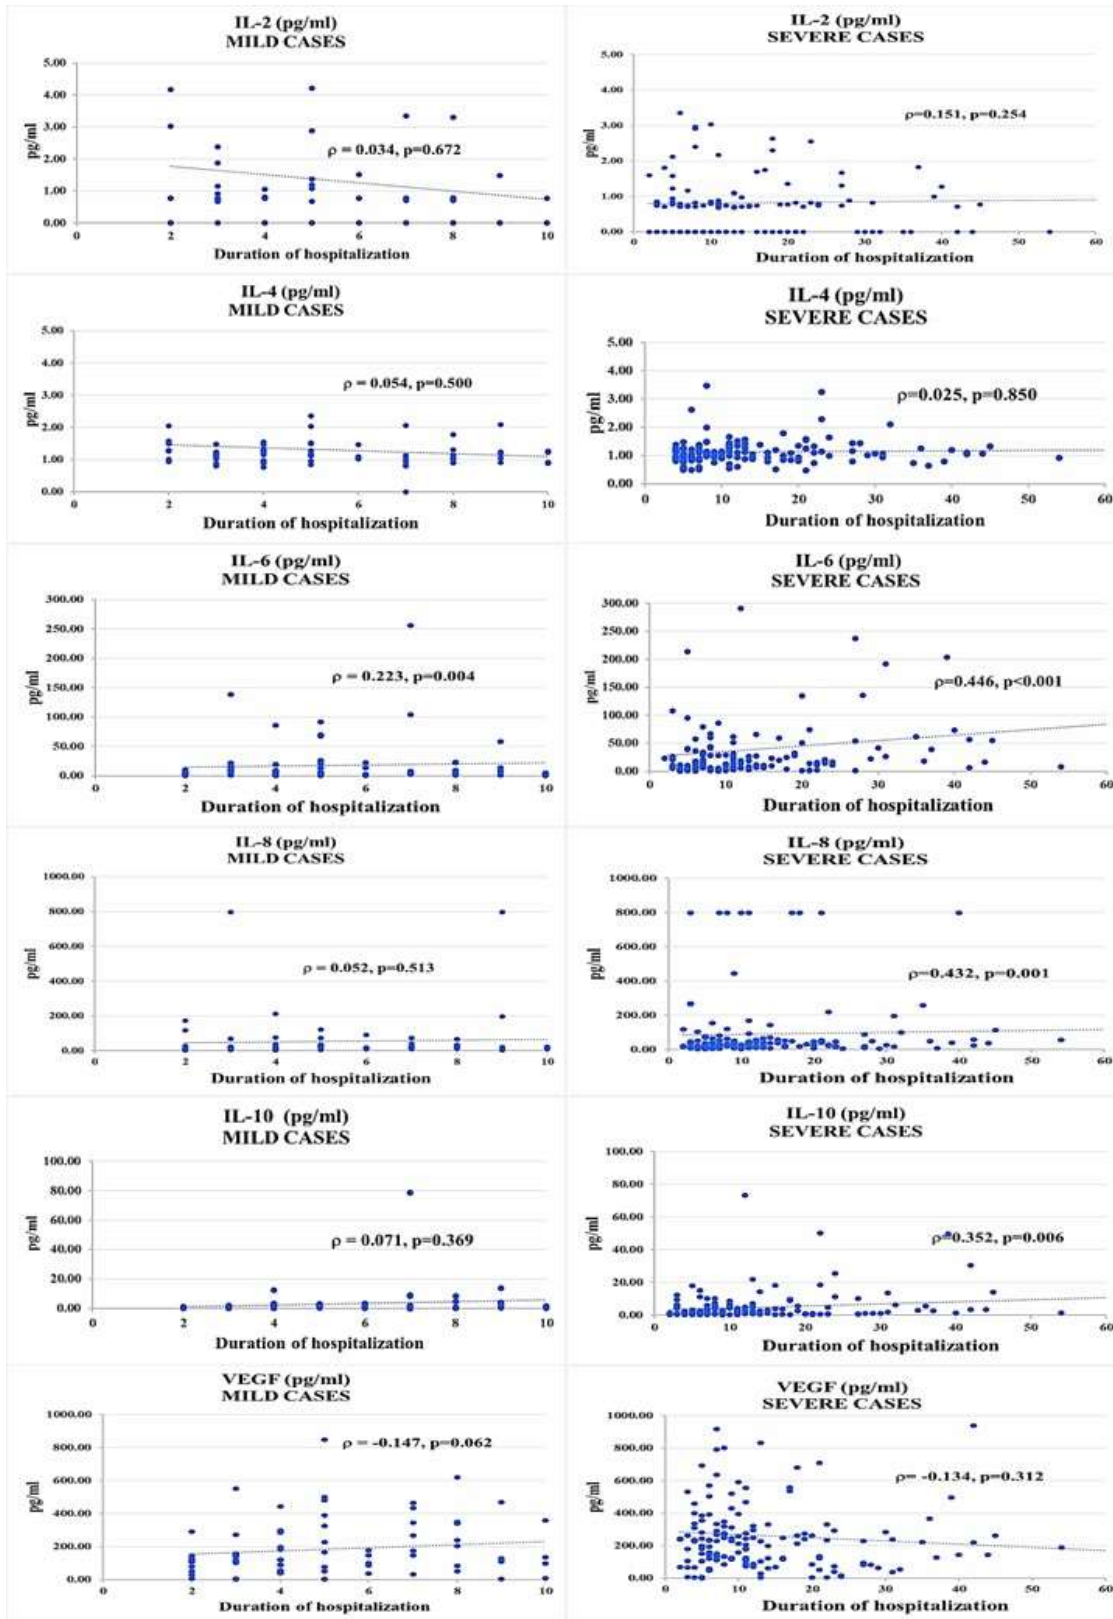

Scatterplot showing the relationship using the nonparametric Spearman correlation test between cytokines and severity of the disease.

IL-2: Interleukin-2, IL-4: Interleukin-4, IL-6: Interleukin-6, IL-8: Interleukin-8, IL-10: Interleukin-10,  
VEGF: Vascular Endothelial Growth Factor

Supplementary Figure 1b. Relationship between cytokines and length of stay in the hospital

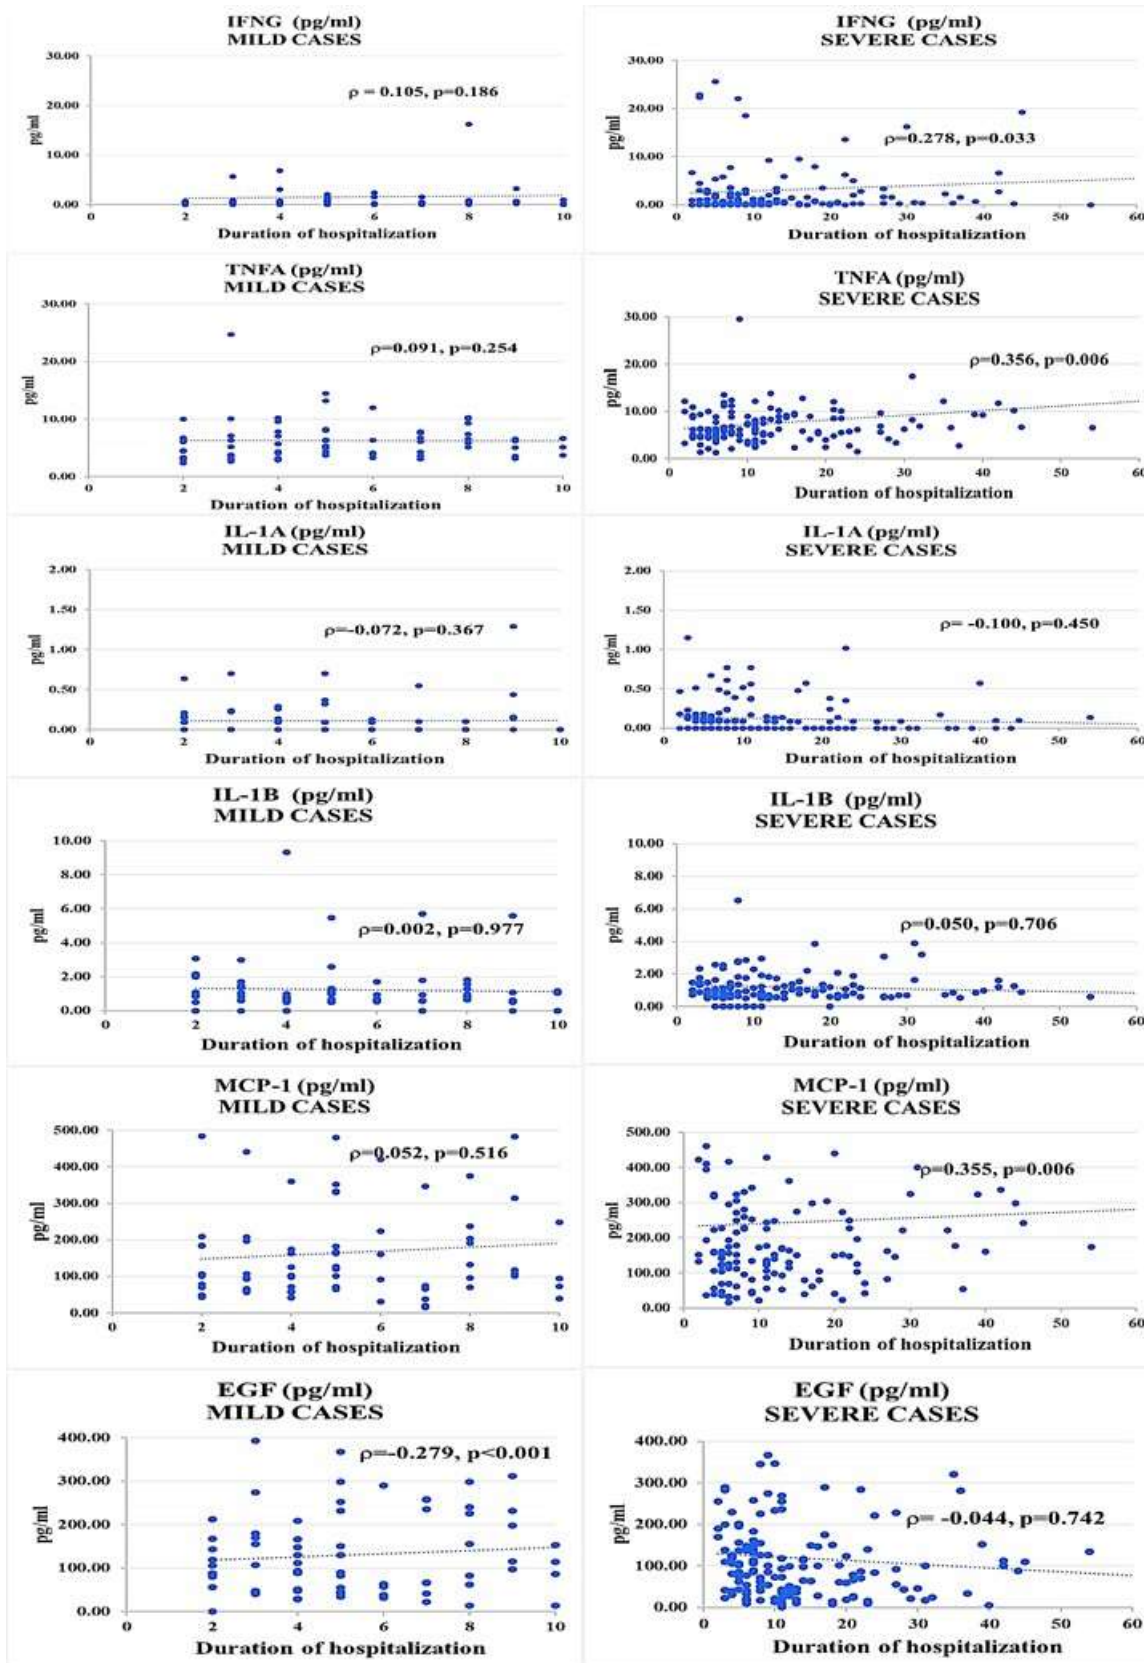

Scatterplot showing the relationship using the nonparametric Spearman correlation test between cytokines and severity of the disease.

EGF: epidermal growth factor, IFNG: Interferon- $\gamma$ , IL-1 $\alpha$ : Interleukin-1 $\alpha$ , IL-1 $\beta$ : Interleukin-1 $\beta$ , MCP-1: Monocyte Chemoattractant Protein-1, TNFA: Tumor Necrosis Factor- $\alpha$ ,
